# Supplementary material for: High Curie temperature and coercivity performance of Fe3−xCrxSe4nanostructures
Source: Royal Society of Chemistry journal article supplement (doi:10.1039/c4nr07287a), 2015-01-01
Supplement: c4nr07287a1.pdf [file c4nr07287a1.pdf]

## Supporting information

# High Curie temperature and Coercivity performance of $\text{Fe}_{2.3}\text{Cr}_{0.7}\text{Se}_4$ Nanostructures

Li, Shao-jie; Li, Da;\* Liu, Wei; Zhang, Zhidong

Shenyang National Laboratory for Materials Science, Institute of Metal Research, Chinese Academy of Sciences, 72 Wenhua Road, Shenyang, 110016, P. R. China

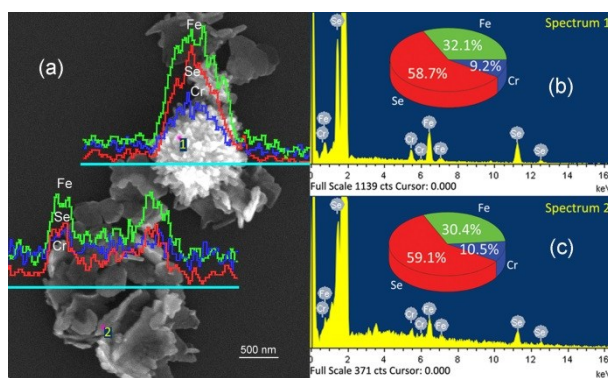

Fig. S1. (a) Line-scan EDS analyses across the  $\text{Fe}_{2.3}\text{Cr}_{0.7}\text{Se}_4$  nanocactus and nanosheets, (b) and (c) the EDS spectra of the  $\text{Fe}_{2.3}\text{Cr}_{0.7}\text{Se}_4$  nanostructures collected at the dots 1 and 2, respectively, in (a). The insets of (b) and (c) show the relative ratio of the composition of Fe, Cr and Se elements in the nanocactus and the nanosheet.

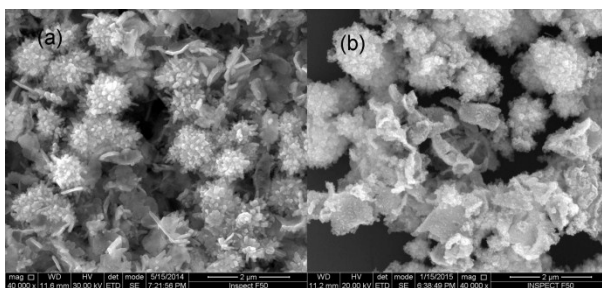

Fig. S2. SEM images for (a) the as-prepared  $\text{Fe}_{2.3}\text{Cr}_{0.7}\text{Se}_4$  nanostructures and (b) the nanostructures heated at 500 K in vacuum for 10 min.
